# Supplementary material for: Operando X-ray absorption spectroscopy studies on Pd-SnO2 based sensors
Source: Royal Society of Chemistry journal article supplement (doi:10.1039/b906829e), 2009-01-01
Supplement: b906829e.pdf [file b906829e.pdf]

## Electronic Support Information “Operando X-ray absorption spectroscopy studies on Pd-SnO<sub>2</sub> based sensors”

Dorota Koziej<sup>a</sup>, Michael Hübner<sup>b</sup>, Nicolae Barsan<sup>b</sup>, Udo Weimar<sup>b</sup>, Marcin Sikora<sup>c,†</sup> and Jan-Dierk Grunwaldt<sup>\*d</sup>

<sup>a</sup> *Department of Materials, ETH Zürich, Wolfgang Pauli-Strasse 10, CH-8093, Switzerland.*

<sup>b</sup> *Institute of Physical and Theoretical Chemistry, University of Tübingen, 72076 Tübingen, Germany*

<sup>c</sup> *European Synchrotron Radiation Facility, Grenoble, France*

<sup>†</sup> *Present address: AGH University of Science and Technology, Krakow, Poland.*

<sup>d\*</sup> *Corresponding author, Department of Chemical and Biochemical Engineering, Technical University of Denmark, 2800 Kgs. Lyngby, Denmark. Tel: + 45 4525 2838; E-mail: jdg@kt.dtu.dk*

The electronic support information gives additional information on the setup (cross sections, Figure ESI-1), transmission electron microscopy images of the SnO<sub>2</sub> particles (Figure ESI-2) and additional EXAFS spectra of 2 wt % Pd:SnO<sub>2</sub> sensors (Figures ESI-3 to ESI-6).

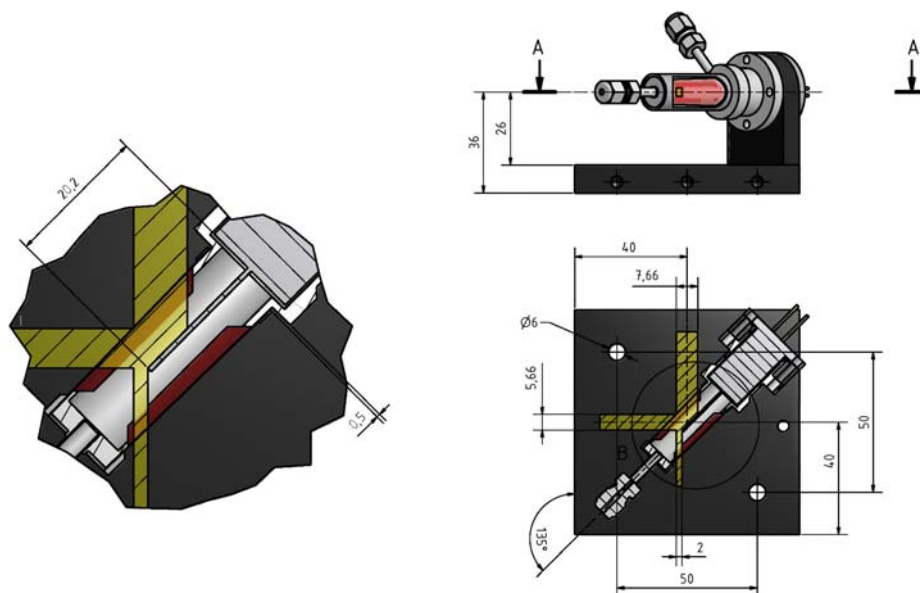

Figure ESI-1: Cross sections of the environmental XAS cell for structure-function relationships.

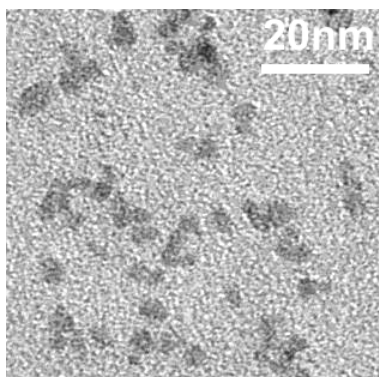

Figure ESI-2: TEM image of 0.2 wt % Pd:SnO<sub>2</sub> powders; here only an overview is shown since no metallic Pd-particles were found.

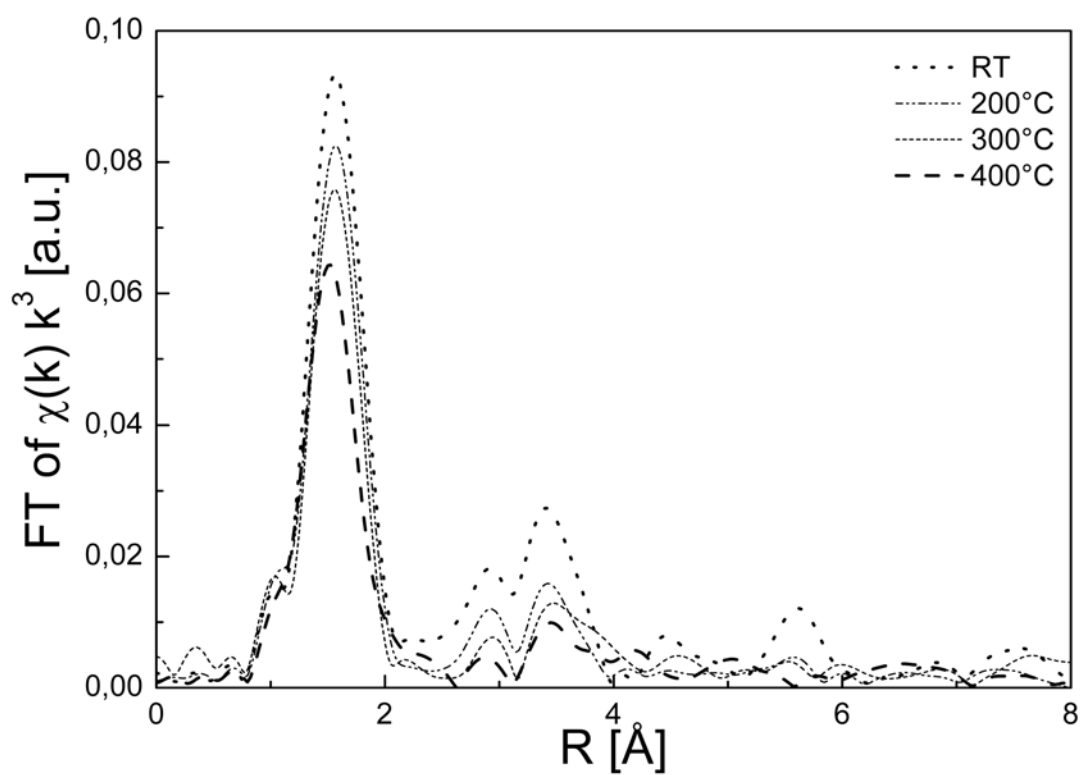

Figure ESI-3: Fourier transformed EXAFS spectra at the Pd K-edge of a 2wt % Pd:SnO<sub>2</sub> sensor in dry air at RT, 200 °C, 300 °C, 400 °C.

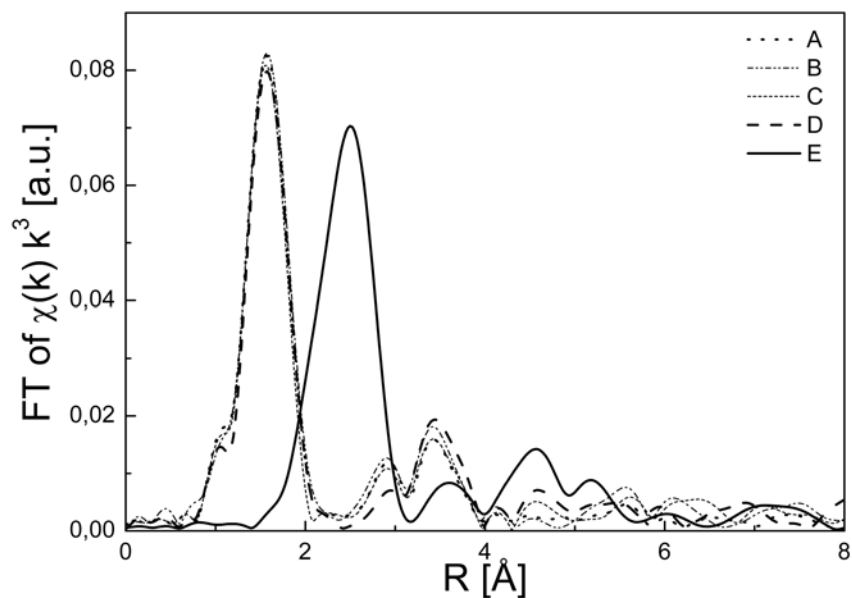

Figure ESI-4: Fourier transformed EXAFS spectra at the Pd K-edge of a 2wt % Pd:SnO<sub>2</sub> sensor under *operando* conditions in dry air (A), exposure to 50 ppm CO in dry air (B) and at 50% relative humidity (D), exposure to 30 ppm H<sub>2</sub> in dry air (C); all data taken at 200 °C; for comparison a palladium foil (E, downscaled by factor of 4) is shown.

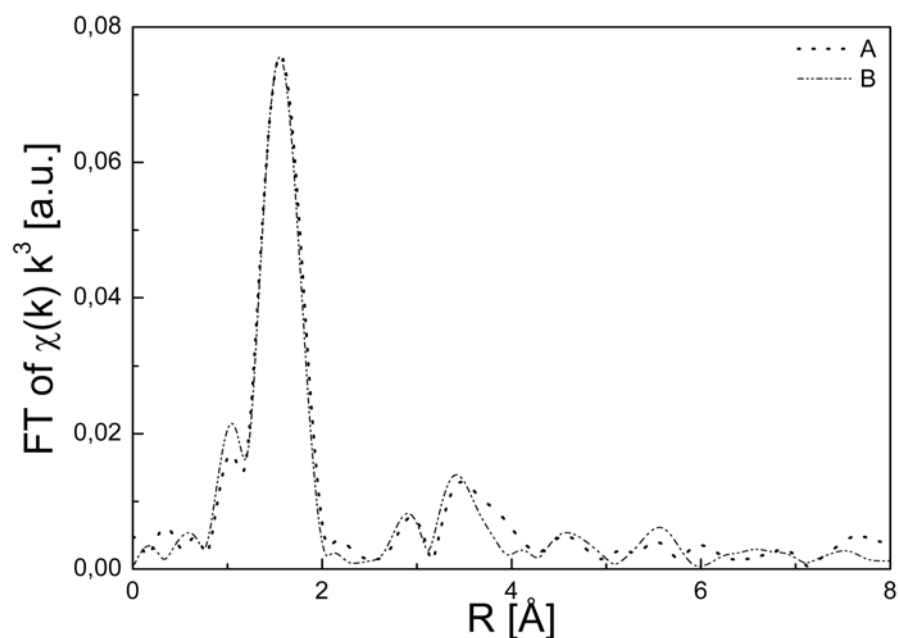

Figure ESI-5: Fourier transformed EXAFS spectra at the Pd K-edge of a 2wt % Pd:SnO<sub>2</sub> sensor in dry air (A) and 50 ppm CO in dry air (B) at 300°C.

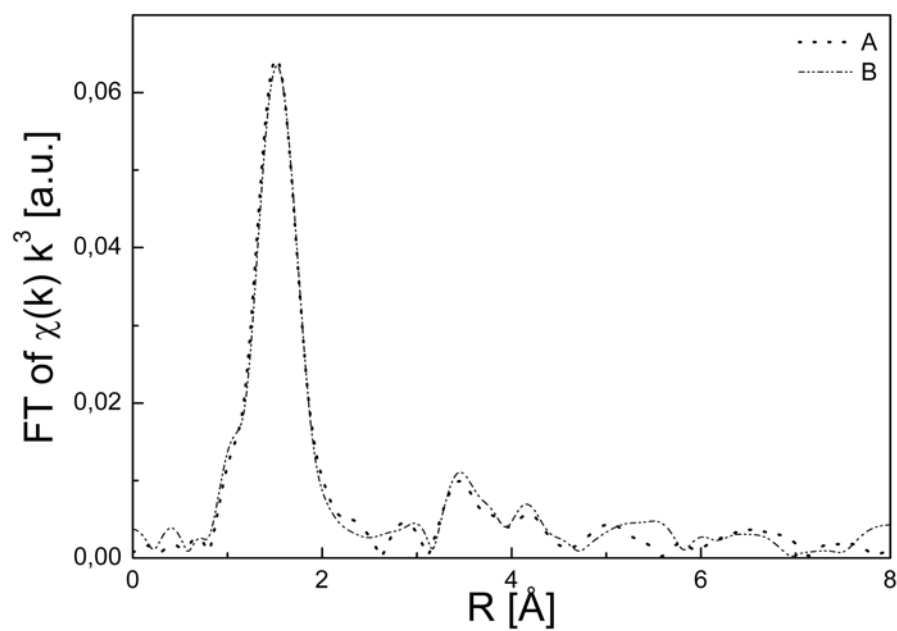

Figure ESI-6: Fourier transformed EXAFS spectra at the Pd K-edge of a 2wt % Pd:SnO<sub>2</sub> sensor in dry air (A) and 50 ppm CO in dry air (B) at 400°C.
